1 **Contrasting population structure and demographic history of cereal aphids in different**  
2 **environmental and agricultural landscapes**

3 Ramiro Morales-Hojas<sup>1\*</sup>, Jingxuan Sun<sup>2</sup>, Fernando Alvira Iraizoz<sup>1</sup>, Xiaoling Tan<sup>2</sup>, Julian Chen<sup>2\*</sup>

4 <sup>1</sup> Rothamsted Insect Survey, Biointeractions and Crop Protection Department, Rothamsted Research,  
5 West Common, Harpenden AL5 2JQ, UK

6 <sup>2</sup> State Key Laboratory for Biology of Plant Diseases and Insect Pests, Institute of Plant Protection,  
7 Chinese Academy of Agricultural Sciences, No. 2 West Yuanmingyuan Rd., Haidian District, Beijing,  
8 100193, P. R. China

9 \* Correspondence: Ramiro Morales-Hojas, e-mail: [ramiro.morales-hojas@rothamsted.ac.uk](mailto:ramiro.morales-hojas@rothamsted.ac.uk),

10 [r.moraleshojas@gmail.com](mailto:r.moraleshojas@gmail.com); Julian Chen, e-mail [chenjulian@caas.cn](mailto:chenjulian@caas.cn)

11 Running title: Population genetics of *Sitobion* in England and China

12

13 **Abstract**

14 Genetic diversity of populations has important ecological and evolutionary consequences, which are  
15 fundamental to improve the sustainability of agricultural production. Studies of how differences in  
16 agricultural management and environment influence the population structure of insect pests are  
17 fundamental to predict outbreaks and optimise control programmes. Here, we have studied the  
18 population genetic diversity and evolution of *Sitobion avenae* and *Sitobion miscanthi* (previously  
19 mistaken for *S. avenae*), which are among the most relevant aphid pests of cereals across Europe  
20 and China, respectively. We have used a genomic approach that allows the identification of weak  
21 geographic structure and migration patterns at scales that were previously not discernible. In the  
22 present study, we show that the population structure in present day populations are different from  
23 that described in previous studies, which suggests that they have evolved recently possibly as a  
24 response to human-induced changes in agriculture. In the UK, *S. avenae* is predominantly  
25 anholocyclic and, as a result of the evolution of insecticide resistance, a superclone is now dominant  
26 across the geographic distribution in the country and the genetic diversity is low. In China, *S.*  
27 *miscanthi* populations are mostly holocyclic, with one sexual stage in autumn to produce  
28 overwintering eggs, and there are six genetically differentiated subpopulations and high genetic  
29 differentiation between geographic locations, which suggests that further taxonomical research is  
30 needed. Unlike in the case of *S. avenae* in England, there is no evidence for insecticide resistance  
31 and there is no predominance of a single lineage in *S. miscanthi* in China.

32 Keywords: cereal aphids, population genetics, China, England, insecticide resistance

33

## 34 **Introduction**

35 A major challenge in agricultural entomology is to develop efficient control strategies for pest  
36 organisms. For this, it is important to understand how environmental and anthropogenic factors  
37 influence the genetic structure and the evolutionary dynamics of insect populations, both for  
38 beneficial and pest species. The level of genetic structure and diversity is the result of a combination  
39 of several factors which include selection, migration and life history (i.e. reproduction mode), and  
40 studying their consequences on insect populations is of great interest to improve ecological  
41 agricultural practices. The use of pesticides remains a necessary way to control and manage pests in  
42 agriculture. However, their use imposes a strong selection pressure on pest populations and  
43 resistance to different types of insecticides has, therefore, evolved in many insects (Bass, Denholm,  
44 Williamson, & Nauen, 2015; Georghiou, 1972). Designing new strategies of pest control that  
45 rationalise the use of insecticides and reduce the likelihood of an evolution of resistance has become  
46 key for the development of sustainable agriculture practices that reduce the environmental  
47 footprint. Understanding how pest populations respond to selective pressure and adapt to  
48 ecological changes is key to design rational strategies of management and control that are more  
49 targeted. In addition, a better understanding of the geographic connectivity between populations  
50 and the dispersal capacity of pests provides valuable information to control their abundance and  
51 distribution, while preventing also the spread of adaptive genetic variation, such as insecticide  
52 resistance, across their geographic range. Therefore, it is essential that we incorporate the  
53 fundamental knowledge about population genetics into agricultural entomology.

54 Aphids comprise some of the most pernicious species of crop pests. In cereals, *Sitobion avenae* and  
55 *Sitobion miscanthi* are two of the most economically important species in Europe and Asia,  
56 respectively, and they are major vectors of the barley yellow dwarf virus (BYDV), which can severely  
57 reduce cereal yield (Vickerman & Wratten, 1979). Both *Sitobion* species are monoecious, feeding  
58 only on Poaceae grasses and cereals. Like many aphids, *S. avenae* and *S. miscanthi* show different  
59 levels of variation in the life-cycle, from individuals that are obligate cyclical parthenogenetic and

60 have a generation that undergoes sexual reproduction in the primary host (holocycly), to clones that  
61 are obligate parthenogenetic and reproduce asexually all year round (anholocycly) (Dedryver, Le  
62 Gallic, Gauthier, & Simon, 1998). In addition, individuals can remain asexual in the cereal crops  
63 during winter as a response to environmental cues such as warmer temperatures and day length. As  
64 a result, a geographic cline in the reproductive type has been described in the *S. avenae* populations  
65 of UK and France, with increasing proportion of sexual reproduction towards the north of the  
66 countries (Llewellyn et al., 2003; Simon et al., 1999). In the case of *S. miscanthi*, variation in the life-  
67 cycle has also been described. Populations from this species in Australia and New Zealand are  
68 anholocyclic, while they are holocyclic in Taiwan (Sunnucks, England, Taylor, & Hales, 1996; Wilson,  
69 Sunnucks, & Hales, 1999). In China, *S. miscanthi* has been traditionally reported to be anholocyclic  
70 (Guo, Shen, Li, & Gao, 2005; Zhang, 1999). However, contrary to the observations in *S. avenae* and  
71 other species, a recent population genetics study has observed signatures of cyclical  
72 parthenogenesis in the southern populations of the country while obligate parthenogenetic  
73 reproduction would be dominant in the north (Wang, Hereward, & Zhang, 2016).

74 Resistance to pyrethroids was first detected in the UK populations of *S. avenae* in 2011. This was due  
75 to a knockdown resistance (*kdr*) mutation (L1014F) in the sodium channel gene (Foster et al., 2014).  
76 This mutation appeared in heterozygosity in one clone of *S. avenae*, known in the literature as clone  
77 SA3, and rapidly increased its abundance in the UK population from 2009 to 2014, although in  
78 variable proportions in different locations and years (Dewar & Foster, 2017; Malloch, Foster, &  
79 Williamson, 2016; Malloch, Williamson, Foster, & Fenton, 2014). The spread of the mutation in the  
80 UK was limited by the fact that the SA3 clone is anholocyclic, so pyrethroid resistance has not spread  
81 to other lineages through sexual recombination. In addition, the high connectivity of the UK  
82 populations (Llewellyn et al., 2003), probably facilitated the geographic spread of the resistant clone  
83 from its location of origin. Therefore, the continued use of pyrethroids combined with the long  
84 dispersal capacity of *S. avenae* has likely favoured the spread of this clone across the UK.

85 Nevertheless, the clonal diversity remained high and similar to the diversity before the evolution of

86 pyrethroid resistance, and other susceptible clones and phenotypes were still present in different  
87 proportions in British populations by 2015 (Llewellyn et al., 2003; Malloch et al., 2016). In the case of  
88 *S. miscanthi*, there is no available information in the literature regarding the evolution of insecticide  
89 resistance. However, understanding the dynamics and movement of the species can help manage  
90 and control the damage in cereal crops, and establish management programs to reduce the  
91 likelihood of insecticide resistance evolution. In China, previous studies have shown high levels of  
92 genetic diversity in *S. miscanthi* (Guo et al., 2005; Wang et al., 2016), similar to those reported for *S.*  
93 *avenae* in the UK and France, and there is genetic differentiation between north and south of the  
94 country but low differentiation within each region, suggesting free gene flow within geographic  
95 regions (Guo et al., 2005; Wang et al., 2016).

96 In the present study we analyse the population genetics and demographic history of *S. avenae* and *S.*  
97 *miscanthi* in England and China, respectively, using a genomic approach to identify potential  
98 differentiation at a fine scale. We discuss the results in view of the differences in life-history types  
99 and the evolution of insecticide resistance, which may be limited by the reproductive type. These  
100 genomics approaches have identified genetic variation at a national and regional scale for other  
101 aphids in regions where they disperse long distances (Morales-Hojas et al., 2019).

102

## 103 **Materials and Methods**

### 104 *Samples*

105 Individuals of *S. avenae* were collected during June-July 2018 using the 12 English 12.2 m high  
106 suction-traps ran by Rothamsted Insect Survey (Table 1). Individuals of *S. miscanthi* were collected in  
107 10 sites across the cereal growing areas of China (Table 1). The 10 individuals of *S. miscanthi* were  
108 collected from the same wheat field but from plants separated by 10 m to reduce the probability of  
109 sampling the same clone.

110

### 111 *DNA extraction and SNP genotyping*

112 DNA was extracted from samples using Qiagen's DNeasy Blood and Tissue kit following the  
113 manufacturer's protocol. Samples of *S. avenae* and *S. miscanthi* were genotyped separately.  
114 Genomic DNA was digested with *MseI* in the case of *S. avenae* and with *ApeKI* in the case of *S.*  
115 *miscanthi*. The library preparation was performed following the standard Illumina pair-end (PE)  
116 protocol, and PE sequencing of 150 bp was performed on an Illumina HiSeq platform. Library  
117 preparation and sequencing of samples were outsourced commercially. Reads quality was assessed  
118 with FastQC v0.67 and, in the case of *S. miscanthi*, the first 10 bases were trimmed due to low  
119 quality using trimmomatic 0.36.1 (Bolger, Lohse, & Usadel, 2014). Reads were mapped to a draft of  
120 the *S. avenae* genome. Duplicates were removed using MarkDuplicates v2.7.1.1 and indels were  
121 realigned with BamLeftAlign v1.0.2.29-1. Variant calling was carried out with FreeBayes v1.0.2.29-3  
122 (Garrison & Marth, 2012). The resulting SNPs from FreeBayes were annotated using snpEff v4.0.  
123 These tools were run using Galaxy v17.05 (Afgan et al., 2016). SNPs called with FreeBayes were  
124 filtered using VCFtools v0.1.14 (Danecek et al., 2011) before the markers were used in subsequent  
125 analyses. Different filtering schemes were used to obtain a dataset that maximised the quality of the  
126 SNPs and genotypes while minimising the missing data at marker and individual levels  
127 (Supplementary Table S1), as recommended by O'Leary, Puritz, Willis, Hollenbeck, and Portnoy  
128 (2018).

129

### 130 *Analyses of population structure*

131 The population structure of both species was investigated using the Bayesian genetic clustering  
132 algorithm implemented in Structure 2.3.4 (Pritchard, Stephens, & Donnelly, 2000). We used the  
133 admixture model with correlated frequencies and, to detect any potential subtle genetic structure,  
134 we ran Structure with the sampling locations set as priors (locprior = 1); this model has the power to  
135 detect a weak structure signal and does not bias the results towards detecting genetic structure  
136 when there is none. In the case of *S. miscanthi*, a first run of Bayesian clustering analyses of the  
137 population structure was carried out with 5 independent simulations with 100,000 burn-in and

138 100,000 mcmc chains for each of  $K$  1–10. An additional run of 5 independent simulations with  
139 100,000 burn-in and 500,000 mcmc chains was carried out for  $K$  5–10 to confirm the results of the  
140 first run and ensure convergence in the mcmc step. In the analyses of *S. avenae* from the UK,  
141 Structure was run with 5 replicates of 500,000 burn-in and 1,000,000 mcmc chains for  $K$  ranging  
142 from 1 to 12. Parameter convergence was inspected visually. We ran the Structure simulations using  
143 a multi-core computer with the R package ParallelStructure (Besnier & Glover, 2013) in the CIPRES  
144 science gateway server (Miller, Pfeiffer, & Schwartz, 2010). The number of  $K$  groups that best fitted  
145 the dataset was estimated using the method of Evanno, Regnaut, and Goudet (2005) using Structure  
146 Harvester Web v0.6.94 (Earl & Vonholdt, 2012). Cluster assignment probabilities were estimated  
147 using the programme Clumpp (Jakobsson & Rosenberg, 2007) as implemented in the webserver  
148 CLUMPAK (Kopelman, Mayzel, Jakobsson, Rosenberg, & Mayrose, 2015).

149 The genetic diversity measures of the populations were estimated using Arlequin 3.5.2.2 (Excoffier,  
150 Laval, & Schneider, 2005). Genetic variation among populations was investigated using an Analysis of  
151 the Molecular Variance (AMOVA) with 10000 permutations using Arlequin 3.5.2.2. We used  
152 hierarchical AMOVA to test the population structures resulting from the Structure runs. Population  
153 pairwise divergence was investigated using  $F_{ST}$ , and the significance was evaluated with 10000  
154 permutations in Arlequin. We ran a Mantel test as performed in Arlequin to evaluate the correlation  
155 between the genetic distances ( $F_{ST}$ ) and the geographic distance between sampling locations in  
156 China estimated using Google maps (Supplementary Table S2). The demographic history of *S. avenae*  
157 was also explored using Arlequin. For this, we first estimated the gametic phase from the multilocus  
158 diploid data using the ELB algorithm with the default parameter values. Population expansion or  
159 bottleneck were inferred using Fu's  $F_S$  (Fu, 1997), and mismatch analyses were run with 1000  
160 bootstrap replicates to estimate the Harpending's raggedness index and the sum of squared  
161 deviation (SSD) given the population expansion and spatial expansion models.

162 Phylogenetic trees for *S. avenae* were constructed using Maximum Likelihood (ML) with RAxML  
163 8.2.12 (Stamatakis, 2014) run in the server CIPRES (Miller et al., 2010). RAxML was run with 1000

164 bootstrap inferences with subsequent ML search using the gtrgamma model. The Lewis correction  
165 for ascertainment bias was implemented as it is the appropriate model for binary datasets that  
166 include only variable sites (as it is the case of SNPs) (Leache, Banbury, Felsenstein, de Oca, &  
167 Stamatakis, 2015; Lewis, 2001).

168

## 169 **Results**

### 170 *Genetic diversity and population structure of S. miscanthi in China*

171 A total of 14520 SNPs (with less than 20% of missing data per individual and 10% per locus,  
172 Supplementary Figures S1) were obtained for the 100 individuals from the 10 Chinese populations.  
173 The levels of gene diversity ( $H_e$ ) observed across all populations are lower than in previous studies of  
174 *S. miscanthi* in China, but similar to that of the UK population of *S. avenae* and other cereal aphids  
175 like *R. padi* (Morales-Hojas et al., 2019) (Table 2). Overall, the Chinese population is not in Hardy  
176 Weinberg Equilibrium (HWE), and the inbreeding coefficient is positive (Table 2). The same positive,  
177 significant  $F_{IS}$  is observed when we group the populations into North China (Qingdao, Tai'an,  
178 Langfang, Taigu, Pingliang and Yinchuan) and South China (Shuzou, Wuhan, Mianyang and Kunming)  
179 following the Qingling-Huaihe line (QHL; the traditional identified geographic North-South divide of  
180 China) (Table 2). Furthermore, several populations in China (Qingdao, Taigu, Yinchuan and Wuhan)  
181 of are also not in HWE, with significant, positive  $F_{IS}$  indices. Significant, positive estimates of  $F_{IS}$  is  
182 generally the result of inbreeding in the population or the effect of population subdivision, the  
183 Wahlund effect.

184 A first run of Bayesian clustering analyses of the population structure was carried out with 5  
185 independent simulations with 100,000 burn-in and 100,000 mcmc chains for each of  $K$  1–10.  
186 Analyses of the results following the Evanno method (Evanno et al., 2005) indicated that the most  
187 likely number of clusters was  $K = 6$ . An additional run of 5 independent simulations with 100,000  
188 burn-in and 500,000 mcmc chains carried out for  $K$  5–10 confirmed that the most likely number of  $K$   
189 was 6 (Table 3, Figure 1). The structure plot shows that most sampled locations are not



190 homogeneous, comprising individuals that are assigned to different genetic clusters (Figure 1). These  
191 results suggest that the Wahlund effect, admixture of different populations, is the most likely reason  
192 for the significant  $F_{IS}$  in Qingdao, Taigu, Yinchuan and Wuhan, which are the populations with more  
193 admixture. This is further supported by the fact that  $F_{IS}$  is non-significant when the individuals are  
194 grouped according to the genetic cluster to which they were assigned by the Bayesian clustering  
195 analyses with Structure and thus, genetic clusters are in HWE except GC2 that includes 27 individuals  
196 from seven different locations (Table 2).

197 Analysis of the molecular variance (AMOVA) indicated that the overall  $F_{ST}$  of *S. miscanthi* in China  
198 was 0.3254 ( $P = 0$ ); thus, 32.54% of the total genetic variation was explained by differences between  
199 the populations. When the individuals were grouped according to their assigned genetic cluster,  
200 40.68% of the genetic variation ( $F_{CT} = 0.4069$ ,  $P = 0$ ) was explained by differences among the groups,  
201 indicating that the grouping of individuals from different populations but with the same genetic  
202 background increased the proportion of genetic variation explained (Table 4). Finally, we tested the  
203 QHL North-South subdivision of the *S. miscanthi* population previously suggested in the literature  
204 with an AMOVA. Results did not support the QHL divide hypothesis with only a non-significant 2.22%  
205 of the genetic variation being explained by such geographic division ( $F_{CT} = 0.0222$ ,  $P = 0.2569$ ) (Table  
206 4).

207 Pairwise  $F_{ST}$  tests showed that the genetic differentiation between the different populations is high  
208 and significant in most cases (Table 5). The only exceptions are between the populations of Suzhou  
209 and Pingliang, and Yinchuan and Taigu, which showed no genetic differentiation. Qingdao and  
210 Tai'an, which are separated by 300 kms, showed a low but significant  $F_{ST}$ , and Langfang, Pingliang,  
211 Mianyang and Suzhou showed an intermediate and significant  $F_{ST}$ , despite some of these locations  
212 being more than 1000 kms apart. The genetic differentiation between the genetic clusters is higher  
213 and significant in all pairwise comparisons (Table 6).

214 The Mantel test was non-significant when no genetic structure within *S. miscanthi* is considered,  
215 rejecting the isolation by distance (IBD) hypothesis. However, as the Bayesian clustering analyses

216 showed, there are 6 likely genetic clusters and this subdivision of the population can bias the test. To  
217 control for this, we performed Mantel tests for each of the identified clusters 2, 5 and 6 separately  
218 (these clusters included individuals from more than one location) but results were still non-  
219 significant. Nevertheless, the low number of individuals for some of the locations within each cluster  
220 limits the statistical power of the tests.

221

#### 222 *Genetic diversity and population structure of S. avenae in the UK*

223 A total of 846 SNPs with less than 25% of missing data per locus and <50% per individual  
224 (Supplementary Figure S2) were identified in 98 individuals from 12 sampling locations across  
225 England. The gene diversity, estimated as the  $H_e$ , is high across all populations (Table 7), although it  
226 is lower than the  $H_e$  observed in a previous analysis of the UK populations using microsatellites  
227 (Llewellyn et al., 2003). The  $H_o$  was higher in all populations compared to the  $H_e$ , resulting in high  
228 negative  $F_{IS}$  estimates which indicate that the *S. avenae* in England is not in HWE (Table 7). This  
229 contrasts with the situation of the UK population 15-20 years ago where most markers in the  
230 analysed populations were in HWE (Llewellyn et al., 2003). Although the negative  $F_{IS}$  values were not  
231 significant according to the permutation test performed by Arlequin 3.5, it should be noted that this  
232 test evaluates the probability of obtaining random values that are higher than the observed ones  
233 rather than the probability of random values being more negative. Therefore, it is most probable  
234 that the P values reported are not correct for these values. The negative  $F_{IS}$  is the result of an excess  
235 of heterozygotes, and it is considered a signature of clonal reproduction.

236 Bayesian clustering analysis was run with 5 replicates of 500,000 burn-in and 1,000,000 mcmc chains  
237 to ensure convergence. Results were analysed following the Evanno method (Evanno et al., 2005),  
238 which suggested that the most likely number of genetic clusters is  $K = 2$  (Table 8). However, this  
239 method does not estimate the  $\Delta K$  for  $K = 1$  and the Mean  $\ln P(K)$  is maximised for  $K = 1$   
240 suggesting that the most likely number of clusters is 1 (Table 8). In addition, the standard deviation  
241 increases from  $K = 2$ , which usually happens after reaching the best  $K$ . Finally, there is no clear

242 distribution of individuals into 2 differentiated clusters in the bar plot resulting from the analyses  
243 with  $k = 2$ , with all of them having some probability of belonging to each cluster (Figure 2b). These  
244 results suggest that there is no population structure but just one genetic cluster.

245 Analyses of the Molecular Variance (AMOVA) also supported the existence of one single gene  
246 cluster. The overall diversity of *S. avenae* in England was low  $F_{ST} = 0.001$  and non-significant among  
247 populations, indicating a low differentiation level. When the individuals were clustered according to  
248 the Structure results for  $K = 2$ , assigning individuals to each genetic cluster according to the  
249 membership coefficient estimated with clump, the amount of genetic variation that was explained  
250 between groups was 2.33% ( $P = 0$ ) (Table 9). These results support those of Structure with one single  
251 genetic cluster and no population structure. In addition, the genetic differentiation estimates ( $F_{ST}$ )  
252 were all negative (Table 10), which indicates that there is no divergence between the different  
253 locations. Similarly, when the two possible genetic clusters identified with Structure are compared,  
254 the  $F_{ST}$  is low (0.0158;  $P = 0$ ), further supporting the lack of population structure in *S. avenae* from  
255 England.

256 Phylogenetic analyses were run using the two multi-SNP haplotypes of each individual. The inferred  
257 ML phylogeny comprised two major clades highly supported by bootstrap (Figure 3). Each of these  
258 two clades included one of the multi-SNP haplotypes from each individual, so that each multi-SNP  
259 haplotype is more closely related to a haplotype from another individual than to the second  
260 haplotype from the same individual. This type of phylogenetic topology can be the result of asexual  
261 reproduction from a single individual, in which all copies from each of the extant haplotypes derive  
262 from one common ancestral haplotype with no recombination. The basal node would represent the  
263 common ancestral clonal individual. Thus, the phylogeny supports the lack of population structure,  
264 and suggests that there is one single clone dominating the English population of *S. avenae*, and the  
265 asexual reproduction of this lineage.

266 Analyses of the historical demography of this species in England showed a population and spatial  
267 expansion, which would be consistent with the increase in frequency of a single insecticide-resistant

268 clone in the population and its spread across different locations. Thus, Fu's  $F_s$  index was negative ( $F_s$   
269 = -25.41,  $P = 0$ ), which is a signature of population expansions. In addition, the mismatch analyses  
270 showed a unimodal distribution and failed to reject departure from the expansion models, resulting  
271 in a non-significant Harpending's raggedness index (0.0001,  $P = 1$ ) for the demographic and spatial  
272 expansion models, and non-significant sum of squared deviation (SSD) for the spatial expansion  
273 model ( $P = 0.438$ ) while significant at the 5% for the population expansion model ( $P = 0.031$ ).

274

## 275 **Discussion**

276 The results from the present study provides information about the evolution of two closely related  
277 species of cereal aphids under different environments and agricultural landscapes. The study  
278 demonstrates that the populations of *S. miscanthi* and *S. avenae* in China and England have evolved  
279 in the last 5 to 20 years, most likely as a result of environmental and human-induced changes such  
280 as insecticide use, and the genetic structure and diversity has changed in comparison with that  
281 observed in earlier studies. This contrasts with what it has been observed previously in another  
282 cereal aphid in England, *Rhopalosiphum padi*, whose population has not shown any change in  
283 genetic diversity or structure at least since 2003 (Morales-Hojas et al., 2019).

284 Results of the study indicate that *S. miscanthi* in China has a higher diversity than previously  
285 identified (Guo et al., 2005; Wang et al., 2016). This can be explained by the higher number of  
286 genome-wide molecular markers that have been used in the present analysis, but the estimated  
287 levels of genetic differentiation were similar to those of the *S. avenae* population in China (Xin,  
288 Shang, Desneux, & Gao, 2014). The species *S. avenae* is known to be present only in Yili, Xinjiang  
289 region in the northwest (Zhang, 1999), so it is likely that some previous studies of this species in  
290 China have used the incorrect taxonomic name. In addition, it could also be the case that there is  
291 undescribed taxonomic diversity within *S. miscanthi* in China, and the high levels of genetic  
292 differentiation observed could be explained by unidentified races. This is the case in Australia, where  
293 there are at least three chromosomal races (Hales, Chapman, Lardner, Cowen, & Turak, 1990), so it

294 is possible that the situation in China is complex as well. Indeed, the high genetic differentiation  
295 observed in the present analysis between the six genetic clusters identified suggests that there are  
296 at least the same number of different taxonomic units, though the present study is not capable to  
297 determine whether they represent subspecies, host races or chromosomal races as in Australia and  
298 New Zealand.

299 While *S. miscanthi* in Australia and New Zealand is predominantly functional parthenogenetic  
300 (Sunnucks et al., 1996; Wilson et al., 1999), the present study indicates that the populations in China  
301 show either a heterozygote deficiency (significant, positive  $F_{IS}$ ) or are in HWE (not significant  $F_{IS}$ ),  
302 suggesting that the species reproduces predominantly by cyclical parthenogenesis. The significant  
303 deficiency of heterozygosity in populations can be explained by the admixture of different genetic  
304 clusters (Wahlund effect) observed in several populations, and the  $F_{IS}$  is not significant for the  
305 genetic clusters indicating that they are in HWE (with the exception of the GC2). This contrasts with  
306 previous studies that inferred an excess of heterozygotes in the northern populations, characteristic  
307 of anholocyclic lineages, while in the southern populations there was a deficiency of heterozygosity,  
308 which is observed in inbred sexual populations or the result of admixed populations (Wahlund  
309 effect) (Wang et al., 2016). However, it is usually the case that in colder regions populations are  
310 cyclical parthenogenetic as the aphids undergo a phase of sexual reproduction to produce eggs to  
311 overwinter; on the other hand, southern populations in warmer regimes can survive as  
312 parthenogenetic individuals throughout the year. The results of Wang et al. (2016) indicate that the  
313 contrary would be the case in Chinese *S. miscanthi*, which is unexpected. Other study of *S. miscanthi*  
314 in China showed that northern populations had heterozygote deficiency while the southern  
315 populations were in HWE or had an excess of heterozygotes, although the significance was not  
316 tested (Guo et al., 2005). The contrasting results between the present and previous analyses are also  
317 at the population subdivision. Thus, we observe no significant north-south differentiation at the QHL  
318 traditional division, identified in one previous study (Wang et al., 2016), and there is no evidence for  
319 isolation by distance (Guo et al., 2005). The population structure identified in the present study

320 suggests that there are six genetic clusters highly differentiated. These clusters do not correspond to  
321 geographic regions and individuals from populations geographically separated by long distances can  
322 belong to the same genetic cluster; only GC1 comprising individuals from only Kunming and GC3  
323 with individuals only from Wuhan are geographically restricted to one location. This suggests that  
324 there is long distance dispersal of *S. miscanthi* aphids across China, although the high differentiation  
325 observed between the genetic clusters suggest low interbreeding between them.

326 In England, the level of genetic differentiation is low across the different populations of *S. avenae*  
327 sampled and there is no evidence for genetic structure. This is in accordance to what it was  
328 previously observed (Llewellyn et al., 2003). This population homogeneity was taken to be the result  
329 of long distance dispersal of aphids, and results from the present study corroborates this. The  
330 population of *S. avenae* in England, however, has evolved in the last 15 years. While most of the  
331 markers and populations studied in 1997-1998 were in HWE, and the population showed an increase  
332 in cyclical parthenogenetic proportion with latitude (Llewellyn et al., 2003), this study shows that the  
333 present English population has an excess of heterozygotes and indicates strong clonality. This  
334 suggests that anholocyclcy is predominant across its range, and there is no evidence for cyclical  
335 parthenogenesis occurring towards the north of the country as expected. This change in the *S.*  
336 *avenae* population is most likely the result of insecticide resistance evolution. In 2011, a knockdown  
337 resistance (*kdr*) mutation to pyrethroids was detected in England's population of *S. avenae*, and  
338 studies showed that the clone that gained this mutation spread and increased its proportion in the  
339 population from 2009 to 2014, and was also observed in Ireland from 2013 (Dewar & Foster, 2017;  
340 Foster et al., 2014; Malloch et al., 2016; Malloch et al., 2014; Walsh et al., 2019). It is therefore likely  
341 that this pyrethroid-resistant clone, which is a facultative parthenogenetic clone (Walsh et al., 2019),  
342 has continued to spread and increase in proportion, being now dominant in the English population.  
343 This is supported by the phylogenetic analysis, which shows a topology characteristic of clonal  
344 organisms. Also, the levels of genetic diversity (as measured by the  $H_e$ ) are now lower than those of  
345 2003 (Llewellyn et al., 2003). Although the markers used are different, it would be expected that

346 using more, genome-wide SNPs would provide a higher level of diversity than a limited number of  
347 microsatellites. In addition, analyses of the demographic history of the population in England  
348 indicates that there has been a population demographic and spatial expansion, which substantiates  
349 the increase in proportion of the insecticide-resistant clone. Thus, as one clone gained the resistance  
350 to pyrethroids in a given location, it increased in number in the location but also expanded its  
351 distribution as it spread to other regions via migration.

352 Overall, this study demonstrates that the populations of two close species of cereal aphids of the  
353 genus *Sitobion* have evolved in recent years in two geographically distant regions under different  
354 environmental and human-influenced conditions. The diversity of *S. miscanthi* in China needs to be  
355 investigated more comprehensively, as the high level of genetic differentiation suggests the  
356 existence of yet unidentified forms. In contrast, the diversity of *S. avenae* has been affected by the  
357 evolution of pyrethroid resistance, and a single clone appears to be now dominating the English  
358 population. In contrast to this, *S. miscanthi* has not gained insecticide resistance despite having been  
359 subject also to its use. In England, the bird cherry – oat aphid, *R. padi*, has not evolved resistance to  
360 insecticides either, despite being sympatric with *S. avenae* and therefore subject to the same  
361 agricultural practices. Why some species evolve resistance while other do not it is still a matter of  
362 study. It has been shown in *Drosophila melanogaster* that thermotolerance influences the  
363 development and spread of insecticide resistance (Fournier-Level et al., 2019). Similarly, the  
364 distribution of cyclical and obligate parthenogenetic aphids is strongly influenced by temperature, so  
365 it is possible that there is a relationship between life-cycle type and insecticide resistance evolution  
366 in aphids. This would explain the evolution of the *kdr* and super-*kdr* mutations in the population of *S.*  
367 *avenae* in England, where it is predominantly anholocyclic, while the sympatric population *R. padi*  
368 and the closely related species *S. miscanthi* in China, which are predominantly cyclical  
369 parthenogenetic, have not.

370

371 **Acknowledgements**

372 This study was made possible by a Biotechnology and Biological Sciences Research Council funded  
373 UK-China Joint Centre for Sustainable Intensification in Agriculture (CSIA) award to Rothamsted  
374 Institute BBS/OS/NW/000004, a grant from the National Key R & D Plan of China (2017YFD0201700)  
375 and the China Agricultural Science and Technology Innovation Programme (ASTIP no. CAAS-  
376 XTCX201820). We would like to thank Rothamsted Insect Survey for providing samples of *Sitobion*  
377 *avenae*, as part of their National Capability core activity funded by Biotechnology and Biological  
378 Sciences Research Council under the core capability grant BBS/E/C/000J0200. RMH was supported  
379 through Rothamsted's Smart Crop Protection strategic programme BBS/OS/CP/000001, funded  
380 through the Biotechnology and Biological Sciences Research Council's Industry Strategy Challenge  
381 Fund. We would also like to thank Thomas Mathers for providing a preliminary version of the  
382 *Sitobion avenae* genome.

383

#### 384 **References**

385

- 386 Afgan, E., Baker, D., van den Beek, M., Blankenberg, D., Bouvier, D., Cech, M., . . . Goecks, J. (2016).  
387 The Galaxy platform for accessible, reproducible and collaborative biomedical analyses:  
388 2016 update. *Nucleic Acids Research*, *44*(W1), W3-W10. doi:10.1093/nar/gkw343  
389 Bass, C., Denholm, I., Williamson, M. S., & Nauen, R. (2015). The global status of insect resistance to  
390 neonicotinoid insecticides. *Pestic Biochem Physiol*, *121*, 78-87.  
391 doi:10.1016/j.pestbp.2015.04.004  
392 Besnier, F., & Glover, K. A. (2013). ParallelStructure: a R package to distribute parallel runs of the  
393 population genetics program STRUCTURE on multi-core computers. *PLoS One*, *8*(7), e70651.  
394 doi:10.1371/journal.pone.0070651  
395 Bolger, A. M., Lohse, M., & Usadel, B. (2014). Trimmomatic: a flexible trimmer for Illumina sequence  
396 data. *Bioinformatics*, *30*(15), 2114-2120. doi:10.1093/bioinformatics/btu170  
397 Danecek, P., Auton, A., Abecasis, G., Albers, C. A., Banks, E., DePristo, M. A., . . . Genomes Project  
398 Analysis, G. (2011). The variant call format and VCFtools. *Bioinformatics*, *27*(15), 2156-2158.  
399 doi:10.1093/bioinformatics/btr330  
400 Dedryver, C. A., Le Gallic, J. F., Gauthier, J. P., & Simon, J. C. (1998). Life cycle of the cereal aphid  
401 *Sitobion avenae* F.: polymorphism and comparison of life history traits associated with  
402 sexuality. *Ecological Entomology*, *23*(2), 123-132.  
403 Dewar, A. M., & Foster, S. P. (2017). Overuse of pyrethroids may be implicated in the recent BYDV  
404 epidemics in cereals. *Outlooks on Pest Management*, *28*(1), 7-12. doi:DOI:  
405 10.1564/v28\_feb\_03  
406 Earl, D. A., & Vonholdt, B. M. (2012). STRUCTURE HARVESTER: a website and program for visualizing  
407 STRUCTURE output and implementing the Evanno method. *Conservation Genetics Resources*,  
408 *4*(2), 359-361. doi:10.1007/s12686-011-9548-7



- 409 Evanno, G., Regnaut, S., & Goudet, J. (2005). Detecting the number of clusters of individuals using  
410 the software STRUCTURE: a simulation study. *Molecular Ecology*, *14*(8), 2611-2620.  
411 doi:10.1111/j.1365-294X.2005.02553.x
- 412 Excoffier, L., Laval, G., & Schneider, S. (2005). Arlequin (version 3.0): An integrated software package  
413 for population genetics data analysis. *Evolutionary Bioinformatics*, *1*, 47-50.
- 414 Foster, S. P., Paul, V. L., Slater, R., Warren, A., Denholm, I., Field, L. M., & Williamson, M. S. (2014). A  
415 mutation (L1014F) in the voltage-gated sodium channel of the grain aphid, *Sitobion avenae*,  
416 is associated with resistance to pyrethroid insecticides. *Pest Manag Sci*, *70*(8), 1249-1253.  
417 doi:10.1002/ps.3683
- 418 Fournier-Level, A., Good, R. T., Wilcox, S. A., Rane, R. V., Schiffer, M., Chen, W., . . . Robin, C. (2019).  
419 The spread of resistance to imidacloprid is restricted by thermotolerance in natural  
420 populations of *Drosophila melanogaster*. *Nature Ecology & Evolution*, *3*(4), 647-656.  
421 doi:10.1038/s41559-019-0837-y
- 422 Fu, Y. X. (1997). Statistical tests of neutrality of mutations against population growth, hitchhiking and  
423 background selection. *Genetics*, *147*(2), 915-925.
- 424 Garrison, E., & Marth, G. (2012). Haplotype-based variant detection from short-read sequencing.  
425 *ArXiv*, *1207.3907v2*.
- 426 Georghiou, G. P. (1972). The Evolution of Resistance to Pesticides. *Annual Review of Ecology and*  
427 *Systematics*, *3*(1), 133-168. doi:10.1146/annurev.es.03.110172.001025
- 428 Guo, W., Shen, Z., Li, Z., & Gao, L. (2005). Migration and population genetics of the grain aphid  
429 *Macrosiphum miscanti* (Takahashi) in relation to the geographic distance and gene flow.  
430 *Progress in Natural Science*, *15*(11), 1000-1004.
- 431 Hales, D. F., Chapman, R. L., Lardner, R. M., Cowen, R., & Turak, E. (1990). Aphids of the Genus  
432 *Sitobion* Occurring on Grasses in Southern-Australia. *Journal of the Australian Entomological*  
433 *Society*, *29*, 19-25.
- 434 Jakobsson, M., & Rosenberg, N. A. (2007). CLUMPP: a cluster matching and permutation program for  
435 dealing with label switching and multimodality in analysis of population structure.  
436 *Bioinformatics*, *23*(14), 1801-1806. doi:10.1093/bioinformatics/btm233
- 437 Kopelman, N. M., Mayzel, J., Jakobsson, M., Rosenberg, N. A., & Mayrose, I. (2015). Clumpak: a  
438 program for identifying clustering modes and packaging population structure inferences  
439 across K. *Molecular Ecology Resources*, *15*(5), 1179-1191. doi:10.1111/1755-0998.12387
- 440 Leache, A. D., Banbury, B. L., Felsenstein, J., de Oca, A. N., & Stamatakis, A. (2015). Short Tree, Long  
441 Tree, Right Tree, Wrong Tree: New Acquisition Bias Corrections for Inferring SNP  
442 Phylogenies. *Systematic Biology*, *64*(6), 1032-1047. doi:10.1093/sysbio/syv053
- 443 Lewis, P. O. (2001). A likelihood approach to estimating phylogeny from discrete morphological  
444 character data. *Systematic Biology*, *50*(6), 913-925. doi:10.1080/106351501753462876
- 445 Llewellyn, K. S., Loxdale, H. D., Harrington, R., Brookes, C. P., Clark, S. J., & Sunnucks, P. (2003).  
446 Migration and genetic structure of the grain aphid (*Sitobion avenae*) in Britain related to  
447 climate and clonal fluctuation as revealed using microsatellites. *Molecular Ecology*, *12*(1), 21-  
448 34. doi:DOI 10.1046/j.1365-294X.2003.01703.x
- 449 Malloch, G., Foster, S. P., & Williamson, M. S. (2016). *Monitoring pyrethroid resistance (kdr) and*  
450 *genetic diversity in UK populations of the grain aphid, Sitobion avenae during 2015* (2016/1).  
451 Retrieved from AHDB:  
452 [https://potatoes.ahdb.org.uk/sites/default/files/publication\\_upload/R480%20Final%20Repo](https://potatoes.ahdb.org.uk/sites/default/files/publication_upload/R480%20Final%20Report_2015%20season.pdf)  
453 [rt\\_2015%20season.pdf](https://potatoes.ahdb.org.uk/sites/default/files/publication_upload/R480%20Final%20Report_2015%20season.pdf)
- 454 Malloch, G., Williamson, M. S., Foster, S. P., & Fenton, B. (2014). *Analysis of grain aphid (Sitobion*  
455 *avenae) populations - genetic composition and the requeryency of pyrethroid resistance*  
456 *(2140004 / R480)*. Retrieved from AHDB:  
457 [https://potatoes.ahdb.org.uk/sites/default/files/publication\\_upload/R480%20Grain%20Aphi](https://potatoes.ahdb.org.uk/sites/default/files/publication_upload/R480%20Grain%20Aphid%202013.pdf)  
458 [d%202013.pdf](https://potatoes.ahdb.org.uk/sites/default/files/publication_upload/R480%20Grain%20Aphid%202013.pdf)

- 459 Miller, M. A., Pfeiffer, W., & Schwartz, T. (2010, 14 November 2010). *Creating the CIPRES Science*  
460 *Gateway for inference of large phylogenetic trees*. Paper presented at the Proceedings of the  
461 Gateway Computing Environments Workshop (GCE), New Orleans.
- 462 Morales-Hojas, R., Gonzalez-Uriarte, A., Iraizoz, F. A., Jenkins, T., Alderson, L., Kruger, T., . . . Bell, J. R.  
463 (2019). Genetic structure at national and regional scale in a long-distance dispersing pest  
464 organism, the bird cherry–oat aphid *Rhopalosiphum padi*. *bioRxiv*, 829986.  
465 doi:10.1101/829986
- 466 O'Leary, S. J., Puritz, J. B., Willis, S. C., Hollenbeck, C. M., & Portnoy, D. S. (2018). These aren't the loci  
467 you'e looking for: Principles of effective SNP filtering for molecular ecologists. *Molecular*  
468 *Ecology*. doi:10.1111/mec.14792
- 469 Pritchard, J. K., Stephens, M., & Donnelly, P. (2000). Inference of population structure using  
470 multilocus genotype data. *Genetics*, *155*(2), 945-959.
- 471 Simon, J. C., Baumann, S., Sunnucks, P., Hebert, P. D. N., Pierre, J. S., Le Gallic, J. F., & Dedryver, C. A.  
472 (1999). Reproductive mode and population genetic structure of the cereal aphid *Sitobion*  
473 *avenae* studied using phenotypic and microsatellite markers. *Molecular Ecology*, *8*(4), 531-  
474 545. doi:DOI 10.1046/j.1365-294x.1999.00583.x
- 475 Stamatakis, A. (2014). RAxML version 8: a tool for phylogenetic analysis and post-analysis of large  
476 phylogenies. *Bioinformatics*, *30*(9), 1312-1313. doi:10.1093/bioinformatics/btu033
- 477 Sunnucks, P., England, P. R., Taylor, A. C., & Hales, D. F. (1996). Microsatellite and chromosome  
478 evolution of parthenogenetic *Sitobion* aphids in Australia. *Genetics*, *144*(2), 747-756.
- 479 Vickerman, G. P., & Wratten, S. D. (1979). Biology and Pest Status of Cereal Aphids (Hemiptera,  
480 Aphididae) in Europe - Review. *Bulletin of Entomological Research*, *69*(1), 1-32. doi:Doi  
481 10.1017/S0007485300017855
- 482 Walsh, L. E., Gaffney, M. T., Malloch, G. L., Foster, S. P., Williamson, M. S., Mangan, R., & Purvis, G.  
483 (2019). First evidence of retained sexual capacity and survival in the pyrethroid resistant  
484 *Sitobion avenae* (F.) (Hemiptera: Aphididae) SA3 super-clone following exposure to a  
485 pyrethroid at current field-rate. *Irish Journal of Agricultural and Food Research*, *58*(1), 21-26.  
486 doi:10.2478/ijafr-2019-0003
- 487 Wang, Y., Hereward, J. P., & Zhang, G. (2016). High Spatial Genetic Structure and Genetic Diversity in  
488 Chinese Populations of *Sitobion miscanthi* (Hemiptera: Aphididae). *Journal of Economic*  
489 *Entomology*, *109*(1), 375-384. doi:10.1093/jee/tov294
- 490 Wilson, A. C. C., Sunnucks, P., & Hales, D. F. (1999). Microevolution, low clonal diversity and genetic  
491 affinities of parthenogenetic *Sitobion* aphids in New Zealand. *Molecular Ecology*, *8*(10),  
492 1655-1666. doi:DOI 10.1046/j.1365-294x.1999.00751.x
- 493 Xin, J. J., Shang, Q. L., Desneux, N., & Gao, X. W. (2014). Genetic diversity of *Sitobion avenae*  
494 (Homoptera: Aphididae) populations from different geographic regions in China. *PLoS One*,  
495 *9*(10), e109349. doi:10.1371/journal.pone.0109349
- 496 Zhang, G. X. (1999). Fauna of agricultural and forestry aphids in Northwest China: Insecta,  
497 Homoptera, Aphidinea. (In Chinese). In (pp. 429-433). Beijing, China: China Environmental  
498 Science Press.

499

500

501 **Data Accessibility**

502 All the DNA sequencing reads have been uploaded to the European Nucleotide Archive (ENA) and  
503 can be found under the study with accession number PRJEB36151. Accession numbers for the  
504 samples' sequencing reads are ERR3810098 – ERR3810316.

505

506 **Authors Contributions**

507 RMH designed the project, performed the research, analysed the data, wrote and revised the  
508 manuscript.

509 JS collected samples, performed the research, revised the manuscript.

510 FAI performed the research, revised the manuscript.

511 XT performed the research, revised the manuscript.

512 JC designed the project, revised the manuscript.

513

514 **Table 1.** Locations and number of samples (N) used in the present study.

| Country | Location          | Geographic coordinates | N  |
|---------|-------------------|------------------------|----|
| UK      | Broom's Barn (BB) | 52.260681, 0.56843     | 10 |
| UK      | Hereford (H)      | 52.124201, -2.638156   | 10 |
| UK      | Kirton (K)        | 52.924454, -0.052153   | 10 |
| UK      | Newcastle (N)     | 55.213254, -1.685083   | 10 |
| UK      | Preston (P)       | 53.854383, -2.76699    | 10 |
| UK      | Rothamsted (RT)   | 51.806997, -0.360091   | 10 |
| UK      | Silwood Park (SP) | 51.40941, -0.643357    | 10 |
| UK      | Starcross (SX)    | 50.629596, -3.45463    | 10 |
| UK      | Wellesbourne (We) | 52.205975, -1.605017   | 10 |
| UK      | Writtle (Wr)      | 51.733599, 0.429233    | 10 |
| UK      | Wye (W)           | 51.185507, 0.944941    | 10 |
| UK      | York (Y)          | 54.014616, -0.97320532 | 10 |
| China   | Kunming (KM)      | 24.8855, 102.8215      | 10 |
| China   | Mianyang (MY)     | 31.5347, 104.5676      | 10 |
| China   | Wuhan (WH)        | 30.5820, 114.0292      | 10 |
| China   | Qingdao (QD)      | 36.3074, 120.3963      | 10 |
| China   | Tai'an (TA)       | 36.1920, 117.1353      | 10 |
| China   | Pingliang (PL)    | 35.5426, 106.6748      | 10 |
| China   | Yinchuan (YC)     | 38.4731, 106.2428      | 10 |
| China   | Langfang (LF)     | 39.5031, 116.6857      | 10 |
| China   | Taigu (TG)        | 37.4212, 112.5513      | 10 |
| China   | Suzhou (SZ)       | 31.3023, 120.6313      | 10 |

515

516

517 **Table 2.** Mean genetic diversity indices estimated for each *S. miscanthi* population, populations  
 518 north and south of the QHL and each of the identified genetic clusters (GC). Ho and He are observed  
 519 and expected (gene diversity) heterozygosity, respectively;  $F_{IS}$  – inbreeding coefficient.

|                | He      | Ho      | $F_{IS}$ | $P(\text{random } F_{IS} \geq \text{observed } F_{IS})$ |
|----------------|---------|---------|----------|---------------------------------------------------------|
| <b>Overall</b> | 0.28933 | 0.16720 | 0.3871   | 0.0000                                                  |
| <b>North</b>   | 0.33122 | 0.19451 | 0.37625  | 0.0000                                                  |
| Qingdao        | 0.3796  | 0.30129 | 0.16357  | 0.0117                                                  |
| Tai'an         | 0.46466 | 0.44985 | -0.01467 | 0.5147                                                  |
| Langfang       | 0.42943 | 0.40584 | 0.00621  | 0.4766                                                  |
| Taigu          | 0.2948  | 0.22396 | 0.21015  | 0.0407                                                  |
| Pingliang      | 0.41717 | 0.34735 | 0.08827  | 0.1097                                                  |
| Yinchuan       | 0.30452 | 0.22792 | 0.24868  | 0.0344                                                  |
| <b>South</b>   | 0.30482 | 0.19169 | 0.33871  | 0.0000                                                  |
| Shuzou         | 0.36834 | 0.313   | 0.10903  | 0.0689                                                  |
| Wuhan          | 0.3134  | 0.19447 | 0.36651  | 0.0004                                                  |
| Mianyang       | 0.46364 | 0.4364  | -0.00632 | 0.4827                                                  |
| Kunming        | 0.35638 | 0.33113 | 0.05435  | 0.2473                                                  |
| GC1            | 0.46035 | 0.49644 | -0.10550 | 0.8083                                                  |
| GC2            | 0.40616 | 0.35361 | 0.07863  | 0.0447                                                  |
| GC3            | 0.45541 | 0.42329 | -0.01105 | 0.5731                                                  |
| GC4            | 0.41227 | 0.37039 | 0.05263  | 0.1626                                                  |
| GC5            | 0.36980 | 0.38917 | -0.08655 | 0.8816                                                  |
| GC6            | 0.42755 | 0.43997 | -0.05740 | 0.5807                                                  |

520 **Table 3.** Table of results from Structure for the Chinese populations (5 independent simulations for K  
521 5 – 10, 100,000 burn-in and 500,000 mcmc chains).

| K  | Reps | Mean LnP(K) | Stdev LnP(K) | Ln'(K)   | Ln''(K)  | Delta K  |
|----|------|-------------|--------------|----------|----------|----------|
| 5  | 5    | -962395     | 53822.58     | NA       | NA       | NA       |
| 6  | 5    | -949885     | 94126.26     | 12510.06 | 49025850 | 520.852  |
| 7  | 5    | -5E+07      | 49016699     | -4.9E+07 | 55801634 | 1.138421 |
| 8  | 5    | -4.3E+07    | 59145788     | 6788294  | 28389784 | 0.479997 |
| 9  | 5    | -6.5E+07    | 41036977     | -2.2E+07 | 59738205 | 1.455717 |
| 10 | 5    | -2.7E+07    | 23812471     | 38136715 | NA       | NA       |

522

**Table 4.** AMOVA of the SNP dataset from *S. miscanthi*. Analyses were performed to test the following hierarchical substructure: (A) individuals grouped according to the genetic cluster assignment from Structure; (B) populations grouped according to their North-South location with respect to the Qingling-Huaihe Line divide.

| A        | Source of variation                  | Sum of squares | Variance components | % variation | Fixation Indices                |
|----------|--------------------------------------|----------------|---------------------|-------------|---------------------------------|
|          | Among groups                         | 146960.625     | 840.81437           | 40.68       | $F_{CT} = 0.4068 (P = 0)$       |
|          | Among populations within groups      | 23445.277      | 83.52677            | 4.04        | $F_{SC} = 0.0681 (P = 0)$       |
|          | Among individuals within populations | 90706.443      | -22.79868           | -1.10       | $F_{IS} = -0.0199 (P = 0.6556)$ |
|          | Within individuals                   | 116543.000     | 1165.43000          | 56.38       | $F_{IT} = 0.4362 (P = 0)$       |
| <b>B</b> | Among groups                         | 17982.662      | 43.99279            | 2.22        | $F_{CT} = 0.0222 (P = 0.2569)$  |
|          | Among populations within groups      | 110074.833     | 614.04835           | 31.01       | $F_{SC} = 0.3172 (P = 0)$       |
|          | Among individuals within populations | 133054.850     | 156.47861           | 7.90        | $F_{IS} = -0.1184 (P = 0)$      |
|          | Within individuals                   | 116543.000     | 1165.43000          | 58.86       | $F_{IT} = 0.4114 (P = 0)$       |

**Table 5.** Genetic differentiation between populations estimated with pairwise  $F_{ST}$  (below the diagonal) and significance ( $P$  values, above the diagonal) of the exact test estimated with 10100 permutations.

|           | South populations |          |         |          | North populations |           |         |         |          |         |
|-----------|-------------------|----------|---------|----------|-------------------|-----------|---------|---------|----------|---------|
|           | Kunming           | Mianyang | Wuhan   | Suzhou   | Yinchuan          | Pingliang | Taigu   | Tai'an  | Langfang | Qingdao |
| Kunming   |                   | 0        | 0.0001  | 0.0001   | 0                 | 0         | 0       | 0       | 0.0001   | 0       |
| Mianyang  | 0.38556           |          | 0.0003  | 0        | 0                 | 0.0001    | 0       | 0       | 0.0001   | 0       |
| Wuhan     | 0.35288           | 0.25497  |         | 0.0002   | 0                 | 0.0001    | 0.0001  | 0.0003  | 0.0002   | 0.0009  |
| Suzhou    | 0.35113           | 0.13993  | 0.20726 |          | 0.0004            | 0.9374    | 0       | 0       | 0        | 0.0003  |
| Yinchuan  | 0.47602           | 0.36352  | 0.48536 | 0.31532  |                   | 0.0012    | 0.9553  | 0       | 0        | 0       |
| Pingliang | 0.36378           | 0.12852  | 0.22950 | -0.00006 | 0.31710           |           | 0.0003  | 0       | 0        | 0       |
| Taigu     | 0.52138           | 0.43957  | 0.54790 | 0.39557  | -0.01011          | 0.40377   |         | 0.0001  | 0        | 0       |
| Tai'an    | 0.40604           | 0.37101  | 0.23802 | 0.29632  | 0.46615           | 0.33196   | 0.52301 |         | 0        | 0.005   |
| Langfang  | 0.37918           | 0.13704  | 0.26178 | 0.11658  | 0.34895           | 0.12602   | 0.42251 | 0.35654 |          | 0.0001  |
| Qingdao   | 0.34611           | 0.27895  | 0.17379 | 0.20910  | 0.40618           | 0.24716   | 0.46340 | 0.05756 | 0.27520  |         |

**Table 6.** Genetic differentiation (pairwise  $F_{ST}$ ) between the six genetic clusters (GC) identified with Structure. All pairwise comparisons were significant ( $P = 0$ ) as estimated with 10100 permutations. GC 1 includes only individuals ( $n = 9$ ) from Kunming; GC 2 comprises individuals from Kunming (1), Langfang (10), Mianyang (10), Pingliang (2), Qingdao (1), Suzhou (1) and Wuhan (2); GC 3 consists of individuals from Wuhan (6); GC 4 includes individuals collected in Taigu (9) and Yinchuan (8); GC 5 is formed by individuals from Qingdao (9), Suzhou (1), Tai'an (10) and Wuhan (2); and GC 6 includes individuals from Pingliang (8), Suzhou (8), Taigu (1) and Yinchuan (2).

|                          | GC 1    | GC 2    | GC 3    | GC 4    | GC 5    | GC 6    |
|--------------------------|---------|---------|---------|---------|---------|---------|
| <b>Genetic cluster 1</b> | 0.00000 |         |         |         |         |         |
| <b>Genetic cluster 2</b> | 0.42822 | 0.00000 |         |         |         |         |
| <b>Genetic cluster 3</b> | 0.46296 | 0.13319 | 0.00000 |         |         |         |
| <b>Genetic cluster 4</b> | 0.43198 | 0.30765 | 0.32792 | 0.00000 |         |         |
| <b>Genetic cluster 5</b> | 0.65910 | 0.45260 | 0.51381 | 0.54811 | 0.00000 |         |
| <b>Genetic cluster 6</b> | 0.55366 | 0.40099 | 0.44521 | 0.38811 | 0.79219 | 0.00000 |

**Table 7.** Mean genetic diversity indices estimated for each *S. avenae* population in England and overall. N is the number of gene copies (2 x number of individuals); Ho and He are observed and expected (gene diversity) heterozygosity, respectively;  $F_{IS}$  – inbreeding coefficient. Starcross values are not included as it was represented by one single individual.

|                | N   | He      | Ho      | $F_{IS}$ | $P(\text{random } F_{IS} \geq \text{observed } F_{IS})$ |
|----------------|-----|---------|---------|----------|---------------------------------------------------------|
| <b>Overall</b> | 196 | 0.28433 | 0.41243 | -0.6928  | 1                                                       |
| Broom's Barn   | 20  | 0.37289 | 0.54525 | -0.6631  | 1                                                       |
| Hereford       | 20  | 0.37214 | 0.53194 | -0.8069  | 1                                                       |
| Kirton         | 18  | 0.38078 | 0.54714 | -0.7750  | 1                                                       |
| Newcastle      | 20  | 0.38088 | 0.56614 | -0.7302  | 1                                                       |
| Preston        | 12  | 0.40722 | 0.57489 | -0.7154  | 1                                                       |
| Rothamsted     | 16  | 0.37388 | 0.51535 | -0.6035  | 1                                                       |
| Silwood Park   | 14  | 0.39285 | 0.54213 | -0.7222  | 1                                                       |
| Starcross      | 2   | -       | -       | -        | -                                                       |
| Wye            | 18  | 0.36667 | 0.51283 | -0.7137  | 1                                                       |
| Wellesbourne   | 20  | 0.35591 | 0.50472 | -0.6003  | 1                                                       |
| Writtle        | 18  | 0.36290 | 0.51392 | -0.6405  | 1                                                       |
| York           | 18  | 0.37310 | 0.53559 | -0.7419  | 1                                                       |

**Table 8.** Table of results from Structure for the English populations (5 independent simulations for K 1 – 12, 500,000 burn-in and 1,000,000 mcmc chains).

| K  | Reps | Mean LnP(K) | Stdev LnP(K) | Ln'(K)   | Ln''(K)  | Delta K  |
|----|------|-------------|--------------|----------|----------|----------|
| 1  | 5    | -55651.5    | 0.8927       | NA       | NA       | NA       |
| 2  | 5    | -59437.7    | 795.9415     | -3786.2  | 4110.34  | 5.164123 |
| 3  | 5    | -67334.3    | 1512.473     | -7896.54 | 4447.6   | 2.940614 |
| 4  | 5    | -70783.2    | 4688.426     | -3448.94 | 3568.64  | 0.761159 |
| 5  | 5    | -70663.5    | 3032.39      | 119.7    | 6005.16  | 1.980339 |
| 6  | 5    | -76549      | 5716.411     | -5885.46 | 12612.16 | 2.206308 |
| 7  | 5    | -69822.3    | 2700.041     | 6726.7   | 9361.38  | 3.467125 |
| 8  | 5    | -72456.9    | 7835.535     | -2634.68 | 7552.04  | 0.963819 |
| 9  | 5    | -67539.6    | 3157.942     | 4917.36  | 4039.52  | 1.279162 |
| 10 | 5    | -66661.7    | 4041.049     | 877.84   | 2479.22  | 0.613509 |
| 11 | 5    | -63304.7    | 2208.609     | 3357.06  | 5218.48  | 2.362791 |
| 12 | 5    | -65166.1    | 3124.338     | -1861.42 | NA       | NA       |



**Table 9.** AMOVA of the SNP dataset from *S. avenae*. Analyses were performed to test the genetic cluster assignment from Structure, K = 2.

| A | Source of variation                  | Sum of squares | Variance components | % variation | Fixation Indices                    |
|---|--------------------------------------|----------------|---------------------|-------------|-------------------------------------|
|   | Among groups                         | 203.571        | 1.87014             | 2.33        | $F_{CT} = 0.0233$ ( $P = 0$ )       |
|   | Among populations within groups      | 397.908        | -0.21891            | -0.27       | $F_{SC} = -0.0028$ ( $P = 0.8146$ ) |
|   | Among individuals within populations | 1765.164       | -55.77004           | -69.41      | $F_{IS} = -0.7087$ ( $P = 1$ )      |
|   | Within individuals                   | 13177.500      | 134.46429           | 167.36      | $F_{IT} = -0.6736$ ( $P = 1$ )      |

**Table 10.** Genetic differentiation between populations estimated with pairwise  $F_{ST}$  (below the diagonal). BB – Broon’s Barn; H – Hereford; K – Kirton; N – Newcastle; P – Preston; RT – Rothamsted; SP – Silwood Park; SX – Starcross; W – Wye; We – Wellesbourne; Wr – Writtle; Y – York.

|    | BB      | H       | K       | N       | P       | RT      | SP      | SX      | W       | We      | Wr      | Y      |
|----|---------|---------|---------|---------|---------|---------|---------|---------|---------|---------|---------|--------|
| BB | 0.0000  |         |         |         |         |         |         |         |         |         |         |        |
| H  | -0.0195 | 0.0000  |         |         |         |         |         |         |         |         |         |        |
| K  | -0.0311 | -0.0297 | 0.0000  |         |         |         |         |         |         |         |         |        |
| N  | -0.0051 | -0.0244 | -0.0438 | 0.0000  |         |         |         |         |         |         |         |        |
| P  | -0.0206 | -0.0454 | -0.0590 | -0.0499 | 0.0000  |         |         |         |         |         |         |        |
| RT | -0.0321 | -0.0410 | -0.0466 | -0.0281 | -0.0433 | 0.0000  |         |         |         |         |         |        |
| SP | -0.0292 | -0.0471 | -0.0419 | -0.0374 | -0.0528 | -0.0549 | 0.0000  |         |         |         |         |        |
| SX | -0.4919 | -0.4619 | -0.4359 | -0.5208 | -0.5768 | -0.5711 | -0.4966 | 0.0000  |         |         |         |        |
| W  | -0.0329 | -0.0328 | -0.0420 | -0.0269 | -0.0430 | -0.0532 | -0.0470 | -0.4958 | 0.0000  |         |         |        |
| We | -0.0162 | -0.0460 | -0.0461 | -0.0301 | -0.0447 | -0.0408 | -0.0515 | -0.5804 | -0.0427 | 0.0000  |         |        |
| Wr | -0.0243 | -0.0420 | -0.0501 | -0.0362 | -0.0483 | -0.0454 | -0.0507 | -0.5559 | -0.0451 | -0.0395 | 0.0000  |        |
| Y  | -0.0139 | -0.0273 | -0.0462 | -0.0449 | -0.0515 | -0.0405 | -0.0444 | -0.5112 | -0.0254 | -0.0406 | -0.0406 | 0.0000 |

**Figure 1.** Structure analysis based on 14520 SNPs across 10 Chinese populations, with  $K = 6$ . Each bar represents one individual and the colours of the bars the posterior probability that each belongs to one of the six genetic clusters.

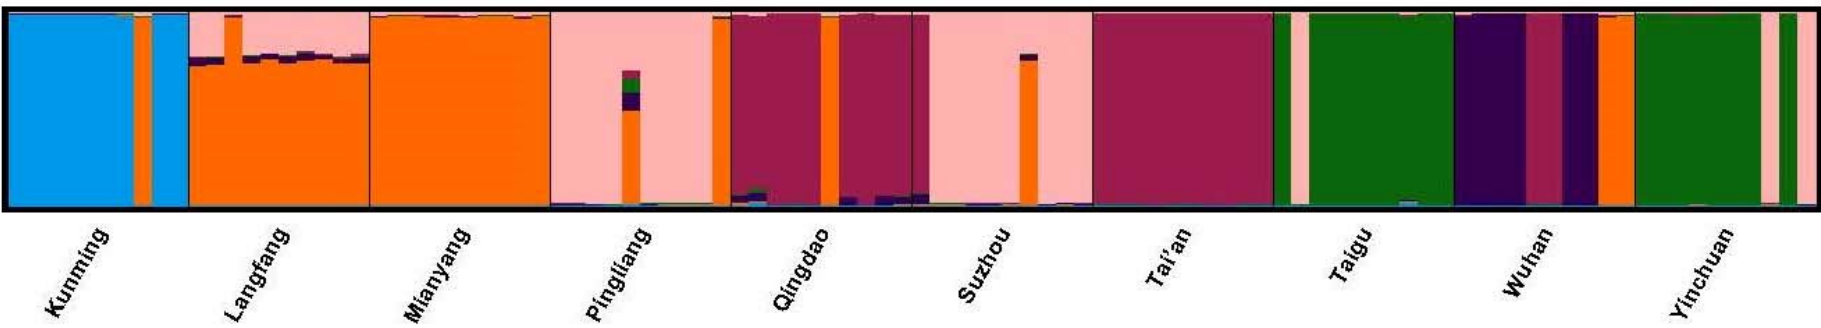

**Figure 2.** Structure analysis based on 846 SNPs across 12 English populations of *S. avenae*, with  $K = 1$  (a) and  $K = 2$  (b). Each bar represents one individual and the colours of the bars the posterior probability that each belongs to each of the genetic clusters.

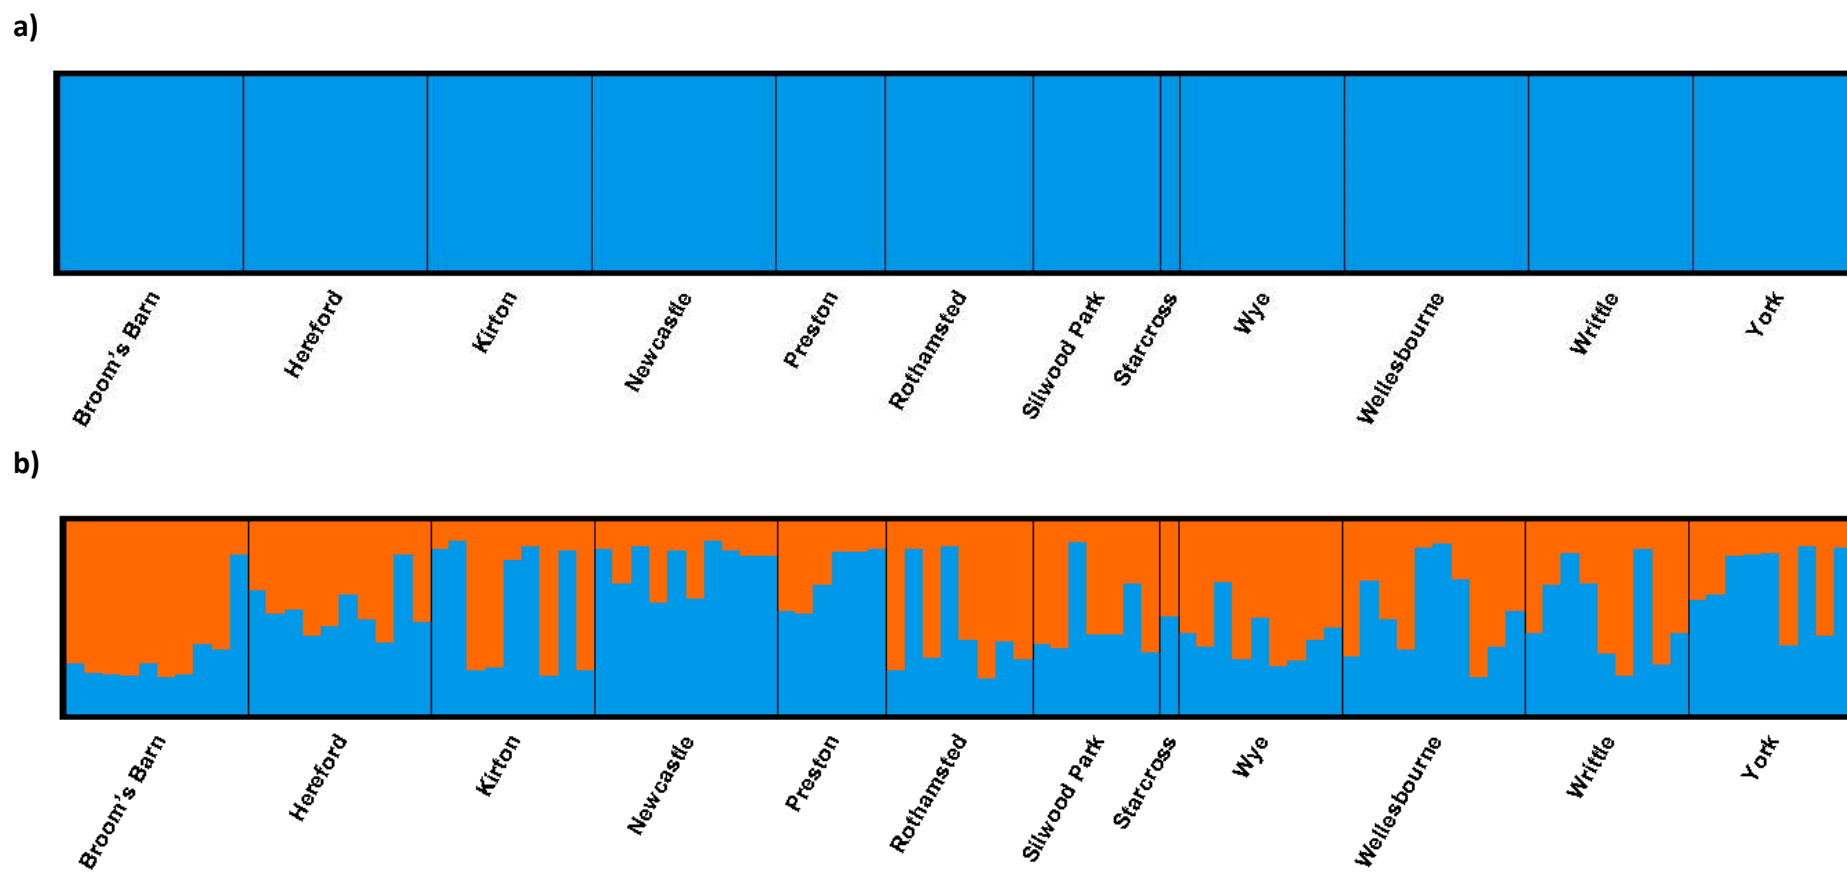

**Figure 3.** Midpoint rooted phylogenetic tree estimated with RAxML for the *S. avenae* samples from England using a dataset of 846 SNPs. The two multi-marker haplotypes from every individual are coloured in red and green, and the clades have been collapsed except for the earliest-branching haplotype of each clade. Labels on branches are bootstrap values > 90%.

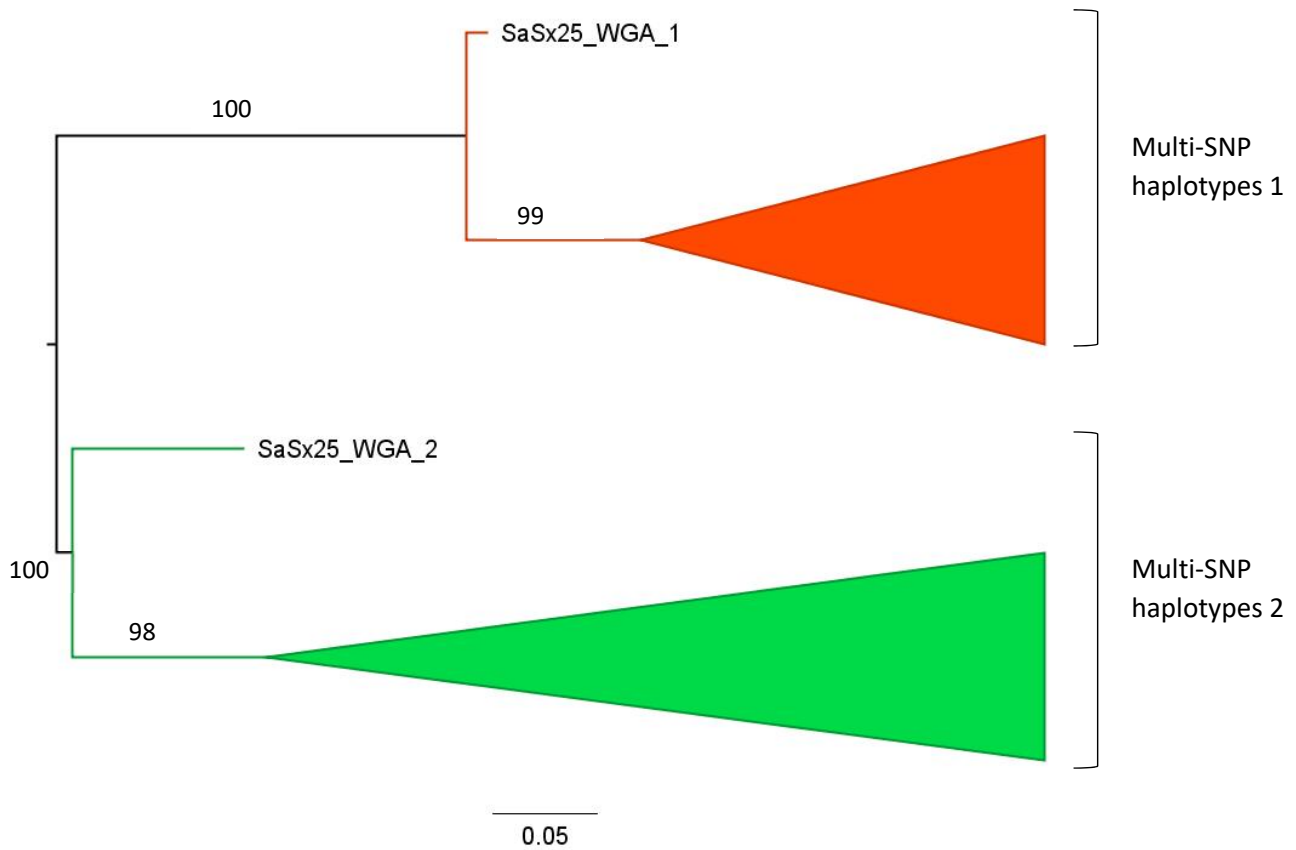

Source: https://www.biorxiv.org/content/10.1101/2020.01.16.909077v1.full.pdf
